1 **Anti-diabetic effects of *Holarrhena antidysentrica* extracts:**  
2 **Results from a Longitudinal Meta-analysis**

3 C. A. Divya<sup>a,b#</sup>, Sujan K Dhar<sup>c#</sup>, Manjula Shantaram<sup>b</sup>, Manjula Das<sup>\*a,c</sup>,

4 <sup>a</sup>Mazumdar Shaw Medical Foundation, 8<sup>th</sup> floor MSMC, Narayana Health City,  
5 Bommasandra, Bangalore 560099, India

6 <sup>b</sup>Department of Studies and Research in Biochemistry, Mangalore University, Jnana  
7 Kaveri Post Graduate Centre, Chikka Aluvara, Kodagu, Karnataka, India, 571 232.

8 <sup>c</sup>Beyond Antibody, InCite Lab, MSMF, Narayana Health City, Bangalore, 560099, India

9

10 # Equal Contribution

11 \* Corresponding Author.

12

13 **E-mail addresses:**

14 C. A. Divya: [divya.biotech82@gmail.com](mailto:divya.biotech82@gmail.com)

15 Sujan K Dhar: [sujan@beyondantibody.com](mailto:sujan@beyondantibody.com)

16 Manjula Shantaram: [manjula59@gmail.com](mailto:manjula59@gmail.com)

17 Manjula Das: [manjula.msmf@gmail.com](mailto:manjula.msmf@gmail.com)

18

19 **Corresponding Author:**

20 Manjula Das

21 Mazumdar Shaw Medical Foundation, 8<sup>th</sup> floor MSMC, Narayana Health City,  
22 Bommasandra, Bangalore 560099, India

23 Email: [manjula.msmf@gmail.com](mailto:manjula.msmf@gmail.com)

24

25 **Keywords:** Diabetes, Medicinal Plant, *Holarrhena antidysenterica*, Meta-analysis,

26

27 **Abbreviations:** CI, confidence interval; HA, *Holarrhena antidysenterica*; mRNA,  
28 messenger ribonucleic acid; PRISMA, preferred reporting items for systematic reviews  
29 and meta-analyses; SMC, standardized mean change; SMD, standardized mean difference;  
30 STZ, Streptozotocin;

## 31 **Abstract**

### 32 ***Background:***

33 *Holarrhena antidysenterica* (HA), a twining shrub belonging to the Apocynaceae family is  
34 found in tropical regions of Africa and over a large part of Asia including India, Philippines  
35 and Malayan Peninsula. In Indian traditional system of medicine, HA has been used to treat  
36 gastric ailments, for wound healing and also to improve glycaemic control. Glucose  
37 lowering activity of HA root, bark, seed, leaf and fruit extract in different parts of India as  
38 well as in Chinese traditional medicine is widely reported.

### 39 ***Purpose:***

40 In the meta-analysis reported in this article, we summarize glucose-lowering effects of  
41 HA extracts from different plant parts as reported in multiple studies involving animal  
42 models of diabetes. Our analysis helps to quantify the glucose-lowering effect of HA in  
43 comparison with standard diabetes drugs. The analysis also sheds light on differential  
44 efficacy levels of HA extracted from different plant parts.

### 45 ***Study design:***

46 The meta-analysis was carried out following PRISMA guidelines. Literature was searched  
47 to identify studies published between years 2011 to 2019 reporting glucose-lowering  
48 effects of HA extract on rodent models of diabetes.

### 49 ***Methods:***

50 Longitudinal meta-analysis was carried out on time-course data extracted from selected  
51 studies to calculate standardized mean change of glucose value from day 1 to days 7, 14  
52 and 21 post-treatment by HA extract or standard anti-diabetic drug. Subgroup analysis  
53 was carried out for studies reporting effects of HA on leaf and seed extracts. Standardized  
54 mean difference in levels of cholesterol, triglycerides and serum total protein between  
55 treatment and control groups were also assessed.

### 56 ***Results:***

57 We shortlisted nine articles to be used for this meta-analysis. Summarized standardized  
58 mean changes of glucose value between day 1 and day 21 post-treatment indicated  
59 glucose-lowering effects of HA extracts to be marginally lower but comparable to that of  
60 standard anti-diabetic drugs like Glibenclamide or Sitagliptin. However, subgroup

61 analysis revealed seed extracts of HA to be more potent than leaf extracts or even  
62 standard drugs. Effects of the extract on levels of cholesterol, triglyceride and serum total  
63 protein was also commensurate with its glucose-lowering property.

64 ***Conclusions:***

65 Our results, summarized over multiple studies, present a clear quantitative assessment  
66 of the anti-diabetic property of HA, in particular the seed extracts compared to standard  
67 anti-diabetic drugs. Further differential analysis of the seed extracts will be useful to  
68 arrive at a herbal formulation with superior anti-diabetic property and possibly lesser  
69 side effects than chemical entities.

## 70 **Introduction**

71 Diabetes mellitus is a chronic and serious metabolic disorder primarily manifested with  
72 a hyperglycaemic condition as body is not able to produce sufficient quantity of Insulin  
73 hormone or is not able to utilize the produced hormone. Latest Diabetic Atlas of  
74 International Diabetic Foundation estimates around 463 million adults (20-79 years)  
75 living with diabetes worldwide which is an astounding proportion of 9.3% of global adult  
76 population(1). China, India and USA currently top the list of number of people with  
77 diabetes and are likely to retain their unenviable ranking in the next ten years. Mortalities  
78 in adults due to diabetes in 2019 was estimated as high as 4.2 million that is nearly twice  
79 the 2.11 million deaths recorded due to COVID-19 till date(2).

80 Several classes of non-insulin pharmacological agents including sulfonylureas,  
81 biguanides, thiazolidinediones, alpha-glucosidase inhibitors, dipeptidyl peptidase IV  
82 inhibitors are currently used in clinic to improve glycaemic control. However,  
83 undesirable side effects of many of these drugs often limit their use. On the other hand,  
84 natural product-based anti-diabetics especially medicinal plants and herbal formulations  
85 are very popular in many geographies due to their easy access, lesser cost and lesser side  
86 effects. Several medicinal plants from middle-east Asia, China, south-east Asia including  
87 India, Malaysia, Bangladesh, parts of Africa and Turkey have been documented in  
88 literature for their use as anti-diabetics(3). In particular India has a large repertoire of  
89 medicinal plants many of which have been used in traditional clinical practice to achieve  
90 glycaemic control(4,5). Herbal formulations from these medicinal plants(6) and  
91 phytocompounds derived from them (7) are shown to have glucose-lowering properties  
92 which make them interesting alternatives for chronic use.

93 *Holarrhena antidysenterica* (HA), an Indian medicinal twining shrub, belonging to the  
94 family Apocynaceae and commonly known as *Kurch* or *Kutaja* has been in use for long in  
95 folklore therapy(8). HA is a major ingredient in several Ayurvedic preparations such as  
96 *Bhunimbadi churna*, *Kutajghan Vati*, *Kutajarista* and *Kutaja churna*, that are used to treat  
97 dysentery, diarrhoea, fever and bacterial infections traditionally in India. In modern  
98 Ayurveda, HA is suggested for obesity, asthma, bronchopneumonia, hepatosplenomegaly,  
99 rheumatism(9) diabetes, cancer and even for wound healing(10). It is also used as an  
100 anti-oxidant and anti-depressant(11).

101 HA is studied extensively for treatment of metabolic diseases where the seed extract has  
102 shown alpha-glucosidase activity in *in vitro* assay(12). Ethanolic and methanolic extracts  
103 of bark from HA shown inhibitory effect of glycemia(13). Treatment of Streptozotocin  
104 (STZ) induced diabetic rats or mice by extracts of HA from different plant parts including  
105 seed, leaf and bark have resulted in lowering of blood glucose over a period of 7 to 21  
106 days post-treatment(14–18)

107 Though many studies have indicated possible glucose-lowering and anti-diabetic activity  
108 of HA extract, its usefulness in comparison with known anti-diabetic compounds is not  
109 well established. Further, usage of various plant parts such as leaf and seed extracted with  
110 different solvent adds heterogeneity and ambiguity in results. In this article, we attempt  
111 to answer some of these questions by carrying out a careful meta-analysis of data  
112 collected from literature on observed anti-diabetic effects of HA extracts in animal  
113 models of diabetes in comparison with effects caused by standard anti-diabetic drugs like  
114 Glibenclamide or Sitagliptin. With a number of studies reported in literature to assess the  
115 anti-diabetic effects of HA extracts, to our knowledge this is the only meta-analysis study  
116 aiming to compare summary effects of HA extract to the effect caused by standard drugs.

## 117 **Meta-analysis Methods**

### 118 ***Selection of Literature***

119 We performed the meta-analysis following PRISMA guidelines(19). Literature search was  
120 performed in PubMed and Google Scholar for articles in English published between 2011  
121 and 2019 with search terms *Holarrhena antidysenterica* in title or abstract. Studies with  
122 STZ-induced diabetic rodent models were identified and included in meta-analysis.  
123 Review articles, commentaries, opinions, individual case studies and articles with only *in*  
124 *vitro* study results were excluded from analysis.

### 125 ***Data Extraction***

126 Selected articles were reviewed independently by two authors (CAD and SKD). Values of  
127 blood glucose and other parameters were extracted from articles using standardized  
128 forms and was cross-validated. Standard errors of various parameters reported in all  
129 selected studies except Keshri et al (20) were converted to standard deviation. Blood  
130 glucose values reported in mmol/L unit (16) were converted to mg/dL using the  
131 relationship 1 mmol/L = 18.018 mg/dL (21). Dose values of extracts and reference drug

132 used, plant parts and solvents for extraction were recorded as mentioned in the articles.  
133 One article (22) did not provide the data in tabular form, for which, data was extracted  
134 from the graphs using WebPlotDigitizer online tool (23). For blood glucose time profile,  
135 the start time was normalized to the day of administration of extract or reference drug.

### 136 ***Meta-Analysis and Meta-Regression***

137 Choice of appropriate statistics for longitudinal meta-analysis is crucial. To measure the  
138 effect in change in blood glucose levels within the same group of animals we use a random  
139 effects model on the standardized mean change (SMC) with raw score  
140 standardization(24), between start of the treatment (day 1) and days 7, 14 and 21 post-  
141 treatment separately for animals treated with HA extract or reference drug. For other  
142 parameters, such as total cholesterol, triglycerides or serum protein measured at the end  
143 of the study period, we use the standardized mean difference (SMD) of measured  
144 parameter between treatment and diabetes control groups with Hedges' correction for  
145 positive bias. All calculations were carried out using the Metafor library (25) on R  
146 statistical software platform. Meta-regression of SMC of blood glucose between start and  
147 day 21 of treatment was carried out using mixed-effects model with dose of the extract  
148 (in mg/kg) and other categorical variables such as plant part and solvent used for  
149 extraction as moderators.

## 150 **Results**

### 151 ***Study Details***

152 The search yielded a total of 104 “hits” which were screened manually to select 9 articles  
153 containing levels of blood glucose and other parameters measured in animal models of  
154 diabetes (Fig. 1). All studies employed STZ-induced rodent models as the experimental  
155 platform.

156 Different plant parts of *H. antidysenterica* such as leaf (18,22) and seed (15,16,20,26–29)  
157 extracted with different solvents such as Ethanol, Ethyl acetate, Water, Petroleum ether  
158 and Methanol were used for treatment of the animals. Leaf or seed were powdered after  
159 air drying in shade and were extracted in a Soxhlet apparatus, employing respective  
160 solvents. Concentrated extract was air dried at room temperature or under reduced  
161 pressure and stored in air tight container in 2–8°C for use in experiments.

162 Some studies also compared glucose-lowering effects of standard drugs such as  
163 Glibenclamide (16,18,20,26–28) or Sitagliptin (22) along with HA on same experimental  
164 platform. Diabetes was induced by single intraperitoneal injection of STZ 50 mg/kg.  
165 Development of diabetes was confirmed by fasting blood glucose estimation 72 h post-  
166 STZ injection, wherein animals were fasted overnight before blood collection. Animals  
167 with fasting blood glucose level above 200 mg/dL at 72 h after STZ injection were  
168 considered diabetic and were included in experiments. Animals were randomly divided  
169 into groups of 6 each and assigned for treatment. Plant extract was administered orally  
170 every day in the dose range 100 – 600 mg/kg along with the reference drug at working  
171 concentration from the day of induction of diabetes. Fasting blood glucose was measured  
172 on days 1, 7, 14, 21 and 28 from start of the treatment.

173 Apart from serum glucose, most studies also reported values of other parameters  
174 (Table 1) out of which only three parameters – serum cholesterol, triglyceride and total  
175 protein were selected for meta-analysis since their values were reported in three or more  
176 studies.

### 177 ***Longitudinal Meta-analysis of Blood Glucose Levels***

178 From results of the studies, it is seen that administration of HA extract has glucose-  
179 lowering effect over days 7 – 21 (Fig. 2). Results of longitudinal meta-analysis (Table 2)  
180 reveal that the effect estimated as SMC (difference with day 1) increases progressively  
181 from day 7 to day 21 for both HA extract as well as reference drug. On day 21, the effect  
182 size of reference drug (12.93, 95% CI: 6.44, 19.42) is higher than the effect produced by  
183 HA extract (9.53, 95% CI: 4.35, 14.70) (Fig. 3). However, results for HA extract showed  
184 higher degree of heterogeneity ( $I^2 = 98.2\%$ ) compared to reference drug (87.3%)  
185 indicating possible variations in the effect size of HA extract due to dose, plant part or  
186 extraction solvent used.

### 187 ***Meta-Regression and Subgroup Analysis***

188 Meta-regression of the serum glucose SMC on day 21 for HA extract with dose as  
189 moderator did not show any statistically significant dependence of the SMC with dose of  
190 extract administered (Supplementary Fig. 1). To estimate variations due to plant parts,  
191 we performed the meta-analysis for the two subgroups, HA leaf and seed extracts used in  
192 studies. This subgroup analysis results (Fig. 4) indicate that extract from seeds have  
193 enhanced glucose-lowering ability (SMC 16.49, 95% CI: 7.99, 25.90) compared to that of

194 leaf (SMC 3.42, 95% CI: 0.55, 6.29). It explains major portion of the observed  
195 heterogeneity of SMC of HA extract in Table 2. In all selected studies seeds were extracted  
196 in ethanol, whereas ethanol, ethyl acetate and water were used for extraction of leaves.  
197 Hence, we did not perform a separate subgroup analysis on the solvent as the results will  
198 not be different than results of plant part subgroups. Nevertheless, it is important to note  
199 that the seed extracts appear to be the most potent anti-diabetic fraction with a higher  
200 glucose lowering effect than the observed effects of Glibenclamide or Sitagliptin.

### 201 ***Meta-analysis of other Markers***

202 Meta-analysis of the other markers shows both HA extract and reference drugs reduce  
203 total cholesterol (Supplementary Fig. 2) and triglycerides (Supplementary Fig. 3) in  
204 serum on day 21 compared to the corresponding value in control diabetic animals who  
205 did not receive any treatment. SMD value for reference drugs is higher than that of HA  
206 extract (Table 3). However, for serum total protein, the reference drugs do not show any  
207 statistically significant summary effect ( $p > 0.1$ ) whereas with HA extract a marginally  
208 significant effect ( $p = 0.051$ ) is observed (Supplementary Fig. 4).

### 209 ***Limitations***

210 Primary limitation of this meta-analysis is the nonuniformity of plant parts and extraction  
211 solvent used across different studies. We performed subgroup analysis on the plant parts  
212 to assess their differential effects on glucose-lowering. However, similar subgroup  
213 analysis for extraction solvents could not be performed as ethanol was mostly used for  
214 extraction of seeds. Most studies used Glibenclamide as the reference drug except one,  
215 which compared the effect of Sitagliptin(22). However, for the comparison of anti-  
216 diabetic effect with HA extract, we summarized effects of both drugs together. All selected  
217 studies used the same number of animals ( $n = 6$ ) for each treatment group, hence test for  
218 publication bias due to differing number of samples was not carried out.

### 219 ***Discussions***

220 Anti-diabetic properties of HA extract are well-known and is reported in many studies  
221 including the ones synthesized in this meta-analysis. However, the consolidation of data  
222 across multiple diverse studies clearly and quantitatively establishes the HA extract as a  
223 potent anti-diabetic agent comparable to standard drugs like Glibenclamide and



224 Sitagliptin. Meta-analysis results for the effects of HA extract to lower the levels of serum  
225 cholesterol and triglyceride and restore levels of serum total protein towards normalcy  
226 further supports it's efficacy as an anti-diabetic.

227 An important finding from this meta-analysis is the dose independence of HA extract to  
228 its observed glucose-lowering effect, that was not apparent from results of individual  
229 studies. However, this is not an uncommon observation, as dose independence of  
230 pharmacological effects of plant extracts were reported in studies with Musa AAA fruit  
231 (30), leaf extracts of *K. Africana*(31) and *Camellia sinensis* green tea extract(32). Possible  
232 explanation for this dose independent behaviour of HA extract could be the saturation of  
233 active transport of phytochemicals to cells in 100 – 600 mg/kg dose range with the excess  
234 amount getting excreted(33). Studies with HA extract at a lower dose range is  
235 recommended to identify its dose-dependent anti-diabetic activity.

236 It's also important to note that seeds of HA extracted with ethanol showing markedly  
237 higher glucose-lowering effect. A comparison of available data on phytochemicals  
238 present in ethanol extract of seed and ethanol /ethyl acetate extracts of leaf (Table 4)  
239 shows differential presence of triterpinoids like betulinic acid, oleanolic acid and amyryn  
240 that are known anti-diabetic agents. STZ-induced diabetic mice treated with  $\beta$ -amyryn  
241 showed reduction in the STZ-induced levels of blood glucose, cholesterol and  
242 triglycerides(34). Similar glucose lowering effect on a STZ-nicotinamide induced diabetic  
243 mice model was observed for treatment with betulinic acid(35). Oleanolic acid, another  
244 triterpenoid, was also shown to reduce blood glucose in STZ-induced rats. This anti-  
245 diabetic activity of oleanolic acid was associated with restoration of mRNA levels of anti-  
246 oxidant enzymes glutathione peroxidase 1 and superoxide dismutase 1 in liver of  
247 animals(36). It's likely that the anti-oxidant properties of these triterpenoid molecules  
248 render their anti-diabetic potential. Quercetin, a flavonoid present in the seed extract is  
249 also studied extensively for its anti-diabetic potential. A recent meta-analysis shows  
250 glucose-lowering effect of quercetin in STZ or alloxan-treated diabetes model synthesized  
251 over 13 different studies(37).

252 These results surely indicate the possibility of individual triterpinoids or flavonoids or  
253 their combinations to render the enhanced anti-diabetic potential of HA seed extracts.  
254 More detailed studies with differential identification of compounds between seed and

255 leaf extracts will perhaps unlock the true antidiabetic potential of HA as a herbal  
256 formulation.

## 257 **Conclusion**

258 This meta-analysis conclusively summarizes the anti-diabetic effect of HA extract seen in  
259 rodent diabetic models across 9 different studies. Ethanol extracts of HA seeds appear to  
260 have more potent glucose-lowering ability than reference drugs like Glibenclamide and  
261 Sitagliptin. Further, the HA extracts also lowered serum cholesterol and triglycerides and  
262 restored total serum proteins in diabetic animals. Further studies on HA extracts can lead  
263 to novel herbal formulations with anti-diabetic effects comparable to chemical  
264 compounds.

## 265 ***Declaration of Interest***

266 Authors declare that there are no conflicts of interest.

## 267 ***Author contribution***

268 CAD: data curation and manuscript preparation, SKD: data curation, statistical analyses  
269 and manuscript preparation, MD: conceived the project and manuscript review, MS:  
270 manuscript review.

## 271 ***Funding***

272 This research did not receive any specific grant from funding agencies in the public,  
273 commercial, or not-for-profit sectors.

## 274 ***Acknowledgement***

275 SKD acknowledges Prof. Joy Kuri, Chair, Department of Electronic Science and  
276 Engineering, Indian Institute of Science, Bangalore for providing the computational  
277 resources.

## 278 ***Supplementary Material***

279 Supplementary information file enclosed

## 280 **References**

- 281 1. International Diabetes Foundation. IDF Diabetes Atlas. 2019.
- 282 2. World Health Organization. COVID-19 Weekly Epidemiological Update - 27 January

- 283           2021. 2021.
- 284    3.   Salehi B, Ata A, Kumar NVA, Sharopov F, Ram K, Ruiz-ortega A, et al. Antidiabetic  
285       Potential of Medicinal Plants and Their Active Components. *Biomolecules*.  
286       2019;9:551.
- 287    4.   Parikh NH, Parikh PK, Kothari C. Indigenous plant medicines for health care :  
288       treatment of Dia- betes mellitus and hyperlipidemia. *Chin J Nat Med*.  
289       2014;12(5):335–44.
- 290    5.   Tota K, Rayabarapu N, Moosa S, Talla V, Bhyravbhatla B. InDiaMed : A  
291       Comprehensive Database of Indian Medicinal plants for Diabetes. *Bioinformation*.  
292       2013;9(7):378–80.
- 293    6.   Modak M, Dixit P, Londhe J, Ghaskadbi S, Devasagayam TPA. Indian herbs and  
294       herbal drugs used for the treatment of diabetes. *J Clin Biochem Nutr [Internet]*.  
295       2007 May [cited 2020 Dec 26];40(3):163–73. Available from:  
296       /pmc/articles/PMC2275761/?report=abstract
- 297    7.   Mukherjee PK, Maiti K, Mukherjee K, Houghton PJ. Leads from Indian medicinal  
298       plants with hypoglycemic potentials. *J Ethnopharmacol*. 2006;106:1–28.
- 299    8.   Shahzadi H, Khan ZH, Khan ND, Mular SM. Phytochemical screening of *Holarrhena*  
300       *antidysenterica*. *Int J Appl Res [Internet]*. 2017;3(1):560–1. Available from:  
301       www.allresearchjournal.com
- 302    9.   Sinha S, Sharma A, Reddy PH, Rathi B, Prasad NVSRK, Vashishtha A. Evaluation of  
303       phytochemical and pharmacological aspects of *Holarrhena antidysenterica* (Wall.):  
304       A comprehensive review. *J Pharm Res*. 2013;6(4):488–92.
- 305    10.   Jamadagni P, Pawar S, Jamadagni S, Chougule S, Gaidhani S, Murthy S. Review of  
306       *Holarrhena antidysenterica* (L.) Wall. ex A. DC.: Pharmacognostic, pharmacological,  
307       and toxicological perspective. *Pharmacogn Rev*. 2017;11(22):141.
- 308    11.   Haque MA, Haque MA, Anwar M, Islam U. Evaluation of Analgesic and Central  
309       Nervous System Depressant Effects of *Holarrhena antidysenterica* Stem on Swiss  
310       Albino Mice Model. *Bangladesh Pharm J*. 2017;20(2):205–12.
- 311    12.   Ali KM, Chatterjee K, De D, Jana K, Bera TK, Ghosh D. Inhibitory effect of hydro-  
312       methanolic extract of seed of *Holarrhena antidysenterica* on alpha-glucosidase

- 313 activity and postprandial blood glucose level in normoglycemic rat. J  
314 Ethnopharmacol [Internet]. 2011;135(1):194–6. Available from:  
315 <http://dx.doi.org/10.1016/j.jep.2011.02.034>
- 316 13. Bhusal A. Evaluation of Antioxidative and Antidiabetic Activity of Bark of  
317 *Holarrhena Pubescens* Wall. J Clin Diagnostic Res. 2014;8(9):9–12.
- 318 14. Keshri UP. Antidiabetic Efficacy of Ethanolic Extract of *Holarrhena Antidysenterica*  
319 Seeds in Streptozotocin – Induced Diabetic Rats and It’S Influence on Certain  
320 Biochemical Parameters. J Drug Deliv Ther. 2012;2(4):159–62.
- 321 15. Ali KM, Chatterjee K, De D, Bera TK, Ghosh D. Efficacy of aqueous extract of seed of  
322 *Holarrhena antidysenterica* for the management of diabetes in experimental model  
323 rat: A correlative study with antihyperlipidemic activity. Int J Appl Res Nat Prod.  
324 2009;2(3):13–21.
- 325 16. Pathak VK, Maiti A, Sundar Gupta S, Shukla I, Rao C V. Effect of the Standardized  
326 Extract of *Holarrhena Antidysenterica* Seeds against Steptozotocin-Induced  
327 Diabetes in Rats. Int J Pharma Res Rev. 2015;4(4):1.
- 328 17. Bandawane D, Patil M, Jadhav S. Flavonoid Rich Fraction of *Holarrhena*  
329 *antidysenterica* Leaves Attenuate Hyperglycemia by Ameliorating Hyperlipidemia  
330 and Oxidative Stress in Type II Diabetes in Rats. Biomed J Sci Tech Res. 2019;16(2).
- 331 18. Hegde K, Jaisal K. Anti-diabetic Potential of Ethanolic Extract of *Holarrhena*  
332 *antidysenterica* Linn Leaves. Int J Pharma Sci Res. 2014;5(08):429–35.
- 333 19. Moher D, Liberati A, Tetzlaff J, Altman DG. Preferred reporting items for systematic  
334 reviews and meta-analyses: The PRISMA statement. Int J Surg. 2010;8(5):336–41.
- 335 20. Keshri UP. Antidiabetic Efficacy of Ethanolic Extract of *Holarrhena Antidysenterica*  
336 Seeds in Streptozotocin – Induced Diabetic Rats and It’S Influence on Certain  
337 Biochemical Parameters. J Drug Deliv Ther. 2012;2(4):159–62.
- 338 21. Riemsma R, Ramos IC, Birnie R, Büyükkaramikli N, Armstrong N, Ryder S, et al.  
339 Integrated sensor-augmented pump therapy systems [the MiniMed® Paradigm™  
340 Veo system and the Vibe™ and G4® PLATINUM CGM (continuous glucose  
341 monitoring) system] for managing blood glucose levels in type 1 diabetes: A  
342 systematic review and economic evaluatio. Health Technol Assess (Rockv). 2016

- 343 Feb;20(17).
- 344 22. Bandawane D, Patil Manasi SJ. Flavonoid Rich Fraction of *Holarrhena*  
345 *antidysenterica* Leaves Attenuate Hyperglycemia by Ameliorating Hyperlipidemia  
346 and Oxidative Stress in Type II Diabetes in Rats. *Biomed J Sci Tech Res.*  
347 2019;16(2):11892–902.
- 348 23. Rohatgi A. WebPlotDigitizer: Version 4.4. 2020.
- 349 24. Morris SB, DeShon RP. Combining effect size estimates in meta-analysis with  
350 repeated measures and independent-groups designs. *Psychol Methods.*  
351 2002;7(1):105–25.
- 352 25. Viechtbauer W. Conducting meta-analyses in R with the metafor. *J Stat Softw.*  
353 2010;36(3):1–48.
- 354 26. Ali K. M, Das Surajit MB. Remedial effect of ethyl acetate fraction of seed of  
355 *Holarrhena antidysenterica* on the management of protein and lipid metabolism  
356 disorders in experimental rat Remedial effect of ethyl acetate fraction of seed of  
357 *Holarrhena antidysenterica*. *Heal Outlook.* 2018;1(1):25–30.
- 358 27. Kumar S, Yadav A. Comparative study of hypoglycemic effect of *holarrhena*  
359 *antidysenterica* seeds and glibenclamide in experimentally induced diabetes  
360 mellitus in albino rats. *Biomed Pharmacol J.* 2015;8(1):477–83.
- 361 28. Sheikh Y, Singh Manral M, Kathait V, Prasar B, Kumar R, Sahu RK. Computation of  
362 In Vivo Antidiabetic Activity of *Holarrhena Antidysenterica* Seeds Extracts in  
363 Streptozotocin-Induced Diabetic Rats. 2015 [cited 2020 Feb 11];14(2):22–7.  
364 Available from: <http://ijpt.iuims.ac.ir>
- 365 29. Ali K, Ghosh D, Chatterjee K, Ghosh A. Bio-efficacy study of aqueous extract of  
366 *Holarrhena antidysenterica* seed on hyperglycemia and oxidative stress in  
367 streptozotocin-induced diabetic rats. *JAST.* 2017;3:1–13.
- 368 30. Kaimal S, Sujatha KS, George S. Hypolipidaemic and antioxidant effects of fruits of  
369 *Musa AAA* (chenkadali) in alloxan induced diabetic rats. *Indian J Exp Biol.*  
370 2010;48(2):165–73.
- 371 31. Njogu SM, Arika WM, Machocho AK, Ngeranwa JJN, Njagi ENM. In Vivo  
372 Hypoglycemic Effect of *Kigelia africana* (Lam): Studies With Alloxan-Induced

- 373 Diabetic Mice. *J Evidence-Based Integr Med.* 2018 Apr;23:1–10.
- 374 32. Stepien M, Kujawska-Luczak M, Szulinska M, Kregielska-Narozna M, Skrypnik D,  
375 Suliburska J, et al. Beneficial dose-independent influence of *Camellia sinensis*  
376 supplementation on lipid profile, glycemia, and insulin resistance in an NaCl-  
377 induced hypertensive rat model. *J Physiol Pharmacol.* 2018 Apr;69(2):275–82.
- 378 33. Arika W, Abdirahman Y, Mawia M. Hypoglycemic Effect of *Lippia javanica* in  
379 Alloxan Induced Diabetic Mice. *J Diabetes Metab.* 2015;6(11):624.
- 380 34. Santos FA, Frota JT, Arruda BR, De Melo TS, Da Silva AADCA, Brito GADC, et al.  
381 Antihyperglycemic and hypolipidemic effects of  $\alpha,\beta$ -amyrin, a triterpenoid mixture  
382 from *Protium heptaphyllum* in mice. *Lipids Health Dis.* 2012;11(98):1–8.
- 383 35. Birgani GA, Ahangarpour A, Khorsandi L, Moghaddam HF. Anti-diabetic effect of  
384 betulinic acid on streptozotocin-nicotinamide induced diabetic male mouse model.  
385 *Brazilian J Pharm Sci.* 2018;54(2):17171.
- 386 36. Wang X, Li Y-L, Wu H, Liu J-Z, Hu J-X, Liao N, et al. Antidiabetic Effect of Oleanolic  
387 Acid: A Promising Use of a Traditional Pharmacological Agent. *Phyther Res.* 2011  
388 Jul;25(7):1031–40.
- 389 37. Bule M, Abdurahman A, Nikfar S, Abdollahi M, Amini M. Antidiabetic effect of  
390 quercetin: A systematic review and meta-analysis of animal studies. *Food Chem*  
391 *Toxicol.* 2019 Mar;125:494–502.
- 392 38. Sinha S, Sharma A, Reddy PH, Rathi B, Prasad NVSRK, Vashishtha A, et al. Effect of  
393 Indrayava (*Holarrhena antidysenterica* Seed) on Inpatient Uncomplicated Severe  
394 Hyperglycaemia: A Case Study. *J Homeopath Ayurvedic Med.* 2013;02(03):2–4.
- 395 39. Patra JM, Panda SS, Pattanayak B, Dhal NK. Validations of Tribal Claims On *Vanda*  
396 *Tessellate* (Roxb.) Hook. Ex G. Don., *Vitex Negundo* L. And *Holarrhena*  
397 *Antidysenterica* Wall. Ex. A. Dc. Through Phytochemical Screening and  
398 Antibacterial Activity. *Int J Biol Pharm Res.* 2015;6(8):593–9.
- 399 40. Rath S, Padhy RN. Antibacterial efficacy of five medicinal plants against multidrug-  
400 resistant enteropathogenic bacteria infecting under-5 hospitalized children. *J*  
401 *Integr Med.* 2015 Jan;13(1):45–57.

402

## Tables

**Table 1: Baseline characteristics of selected studies**

| Reference | Plant part | Solvent                          | Animal Model                                 | No of Animals | HA dose (mg/kg) | Ref drug used | Ref drug dose (mg/kg) | Glucose measurement day | Other parameters measured                                                                                                                                                                   |
|-----------|------------|----------------------------------|----------------------------------------------|---------------|-----------------|---------------|-----------------------|-------------------------|---------------------------------------------------------------------------------------------------------------------------------------------------------------------------------------------|
| (18)      | Leaf       | Ethanol                          | STZ induced Wister albino rats               | 6             | 200,400         | Glibenclamide | 5                     | 1,7,14,21               | Body weight, GPT and GOT                                                                                                                                                                    |
| (26)      | Seed       | Ethyl acetate                    | STZ induced Wister albino rats               | 6             | Not mentioned   | Glibenclamide | 0.6                   | 1,7,14,21,28            | Triglyceride, HDL, Cholesterol, LDL, VLDL, Protein, Albumin, Insulin, body weight, Hepato-somatic index, Reno-somatic index, Globulin, Uric acid, Creatinine, Urea and Blood urea nitrogen. |
| (16)      | Seed       | 50% ethanol                      | STZ induced diabetic Sprague-Dawley rats     | 6             | 100, 300        | Glibenclamide | 1                     | 1,7,14,21               | Triglyceride, OGTT, Cholesterol, Lipids                                                                                                                                                     |
| (28)      | Seed       | Water, petroleum ether, methanol | STZ-induced diabetic Male wistar albino rats | 6             | 250             | Glibenclamide | 10                    | Not measured            | Triglyceride, Cholesterol, Protein, body weight, Urea                                                                                                                                       |

| Reference | Plant part | Solvent       | Animal Model                                        | No of Animals | HA dose (mg/kg) | Ref drug used | Ref drug dose (mg/kg) | Glucose measurement day | Other parameters measured                                                                                                                                                           |
|-----------|------------|---------------|-----------------------------------------------------|---------------|-----------------|---------------|-----------------------|-------------------------|-------------------------------------------------------------------------------------------------------------------------------------------------------------------------------------|
| (29)      | Seed       | Water         | STZ induced diabetic wistar strain male albino rats | 6             | 400             | Glibenclamide | 0.6                   | 1,7,14,21,28            | Haemoglobin, Glycosylated Hb, Insulin, Body weight, creatinine, urea, GPT, GOT, ALP,                                                                                                |
| (22)      | Leaf       | Ethyl acetate | STZ-induced diabetic Wistar rats                    | 6             | 100, 200, 400   | Sitagliptin   | 3                     | 1,7,14,21,28            | Triglycerides, HDL, OGTT, Cholesterol, LDL, VLDL, Haemoglobin, Glycosylated Hb, Liver and Skeletal muscle glycogen, albumin, Insulin, Body weight, food and water intake,           |
| (27)      | Seed       | 90 % Ethanol  | STZ-induced diabetic Male albino wister rat         | 6             | 300             | Glibenclamide | 5                     | 1,7,14,21,28            | Body weight                                                                                                                                                                         |
| (15)      | Seed       | Water         | STZ-induced diabetic wister male albino rats        | 6             | 600             | Not mentioned |                       | 1,7,14                  | Triglycerides, HDL, LDL, VLDL, Liver and Skeletal muscle glycogen, body weight, hexokinase, glucose-6-phosphatase, glucose-6-phosphate dehydrogenase, Liver and kidney GOT and GPT. |



| Reference | Plant part | Solvent      | Animal Model                     | No of Animals | HA dose (mg/kg) | Ref drug used | Ref drug dose (mg/kg) | Glucose measurement day | Other parameters measured                                                             |
|-----------|------------|--------------|----------------------------------|---------------|-----------------|---------------|-----------------------|-------------------------|---------------------------------------------------------------------------------------|
| (20)      | Seed       | 90 % Ethanol | STZ-induced diabetic albino rats | 6             | 300, 600        | Glibenclamide | 5                     | 1,7,14,21,28            | Triglycerides, OGTT, Protein, body weight, uric acid, creatinine, Urea, AST, ALP, ALK |

STZ: Streptozotocin, GPT: Glutamic Pyruvic Transaminase, GOT: Glutamic Oxaloacetic Transaminase, HDL: High Density lipoprotein, LDL: Low Density lipoprotein, VLDL: Very Low-Density lipoprotein, OGTT: Oral Glucose Tolerance Test, ALP/ALK: Alkaline phosphatase, AST: aspartate transaminase and ALT: alanine transaminase.

**Table 2: Results of longitudinal meta-analysis of serum glucose after treatment with HA extract or reference drug**

| Day after Treatment | Treatment with HA Extract                               |                                 | Treatment with reference drug                           |                                 |
|---------------------|---------------------------------------------------------|---------------------------------|---------------------------------------------------------|---------------------------------|
|                     | Effect size (SMCR) on serum glucose with day 1 (95% CI) | Heterogeneity (I <sup>2</sup> ) | Effect size (SMCR) on serum glucose with day 1 (95% CI) | Heterogeneity (I <sup>2</sup> ) |
| Day 7               | 4.04 (1.41, 6.68)<br>p < 0.01                           | 97.2%                           | 6.65 (2.97, 10.34)<br>p < 0.001                         | 89.3%                           |
| Day 14              | 7.18 (3.02, 11.34)<br>p < 0.001                         | 98.0%                           | 10.65 (4.95, 16.35)<br>p < 0.001                        | 89.4%                           |
| Day 21              | 9.53 (4.35, 14.70)<br>p < 0.001                         | 98.2%                           | 12.93 (6.44, 19.42)<br>p < 0.0001                       | 87.3%                           |

**Table 3: Meta-analysis results for the change of cholesterol, triglycerides and serum total protein between treatment and control group of animals**

| Parameter     | Treatment with HA Extract                     |                                 | Treatment with reference drug                 |                                 |
|---------------|-----------------------------------------------|---------------------------------|-----------------------------------------------|---------------------------------|
|               | Effect size (SMD) with control group (95% CI) | Heterogeneity (I <sup>2</sup> ) | Effect size (SMD) with control group (95% CI) | Heterogeneity (I <sup>2</sup> ) |
| Cholesterol   | -5.32 (6.89, -3.77)<br>p < 0.0001             | 73.9%                           | -9.05 (-14.08, -4.02)<br>p < 0.01             | 79.0%                           |
| Triglycerides | -6.03 (-7.44, -4.61)<br>p < 0.0001            | 62.4%                           | -9.03 (-13.34, -4.71)<br>p < 0.0001           | 83.2%                           |
| Serum Protein | 3.44 (-0.01, 6.88)<br>p = 0.051               | 96.5%                           | 4.79 (-1.33, 10.91)<br>p > 0.1                | 95.5%                           |

**Table 4: Comparison of phytochemicals present in ethanol extract of HA seed and ethanol / ethyl acetate extract of leaf**

| Plant part | Solvent       | Compound                                                                                                                                                                               | References |
|------------|---------------|----------------------------------------------------------------------------------------------------------------------------------------------------------------------------------------|------------|
| Seed       | 50 % Ethanol  | alkaloids, carbohydrates, flavonoids including quercetin, tannins and phenolic compounds                                                                                               | (16)       |
| Seed       | 90 % Ethanol  | Alkaloids, carbohydrates, flavonoids, tannins and phenolic compounds, Saponins and steroids                                                                                            | (27)       |
| Seed       | Ethanol       | Serine protease, pentacyclic triterpenoids, (lupeol, betulinaldehyde, and betulinic acid) steroidal compound (stigma sterol), dihydrocanaric acid, amyrin, betulin, and oleanolic acid | (38)       |
| Leaf       | Ethanol       | Flavonoids, alkaloids, tannins and steroids                                                                                                                                            | (18)       |
| Leaf       | Ethanol       | Saponins, Amino acids, Phenol and Glycosides                                                                                                                                           | (39)       |
| Leaf       | Ethanol       | Terpenoids and reducing sugars                                                                                                                                                         | (40)       |
| Leaf       | Ethyl acetate | Total phenols, tannin and flavonoids                                                                                                                                                   | (22)       |
| Leaf       | Ethyl acetate | Flavonoids Alkaloids, Glycosides, Terpenoids, reducing sugars, Saponins, Tannins and Steroids                                                                                          | (40)       |

## Figures

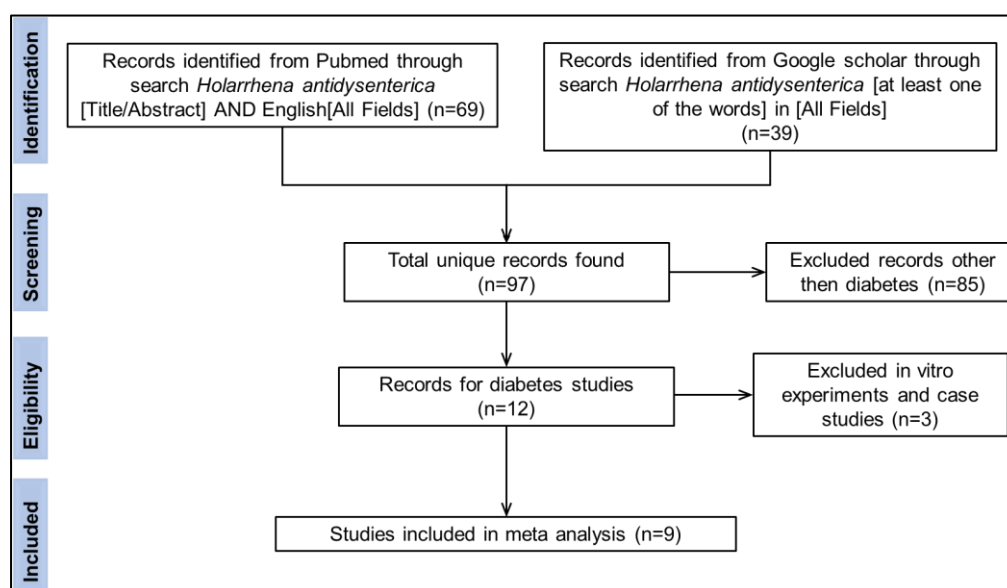

**Figure 1: PRISMA flow diagram for literature search**

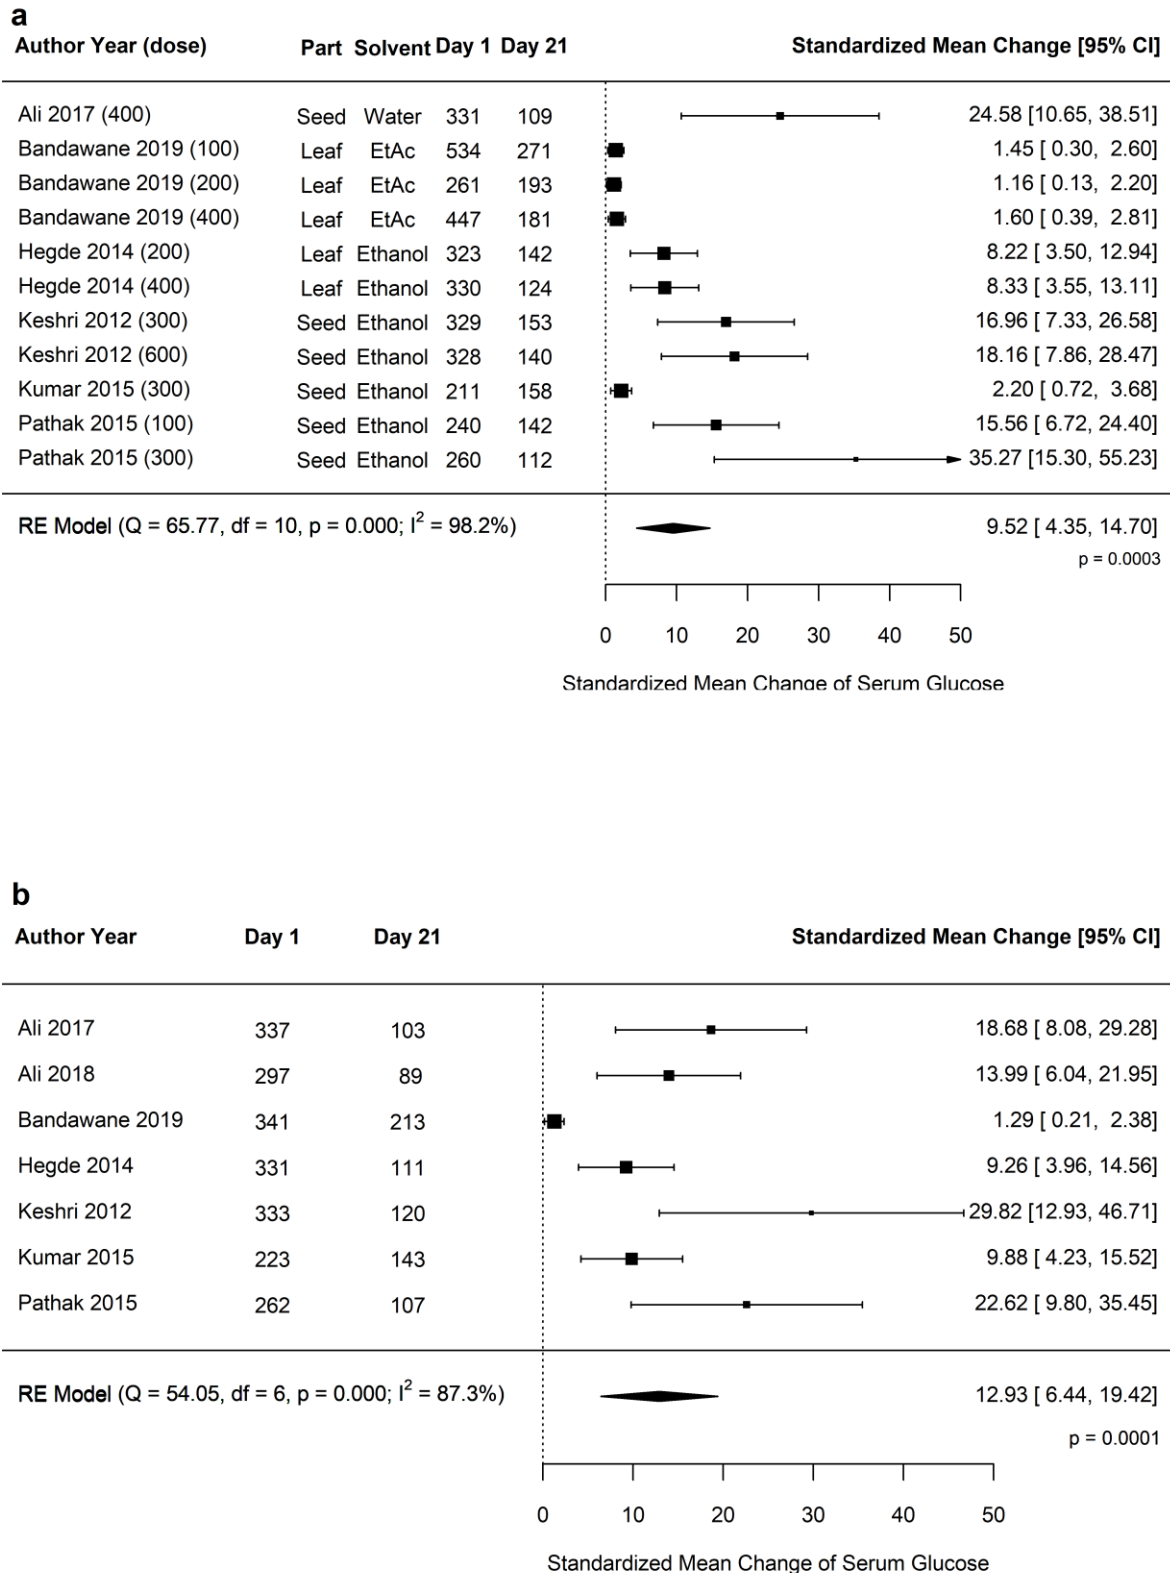

**Figure 2: Effect on serum glucose by administration of HA extract**

**Figure 3: Standardized mean change of serum in animals treated with (a) HA extract and (b) reference drug glucose between day 1 and day 21 post-treatment**

**a**

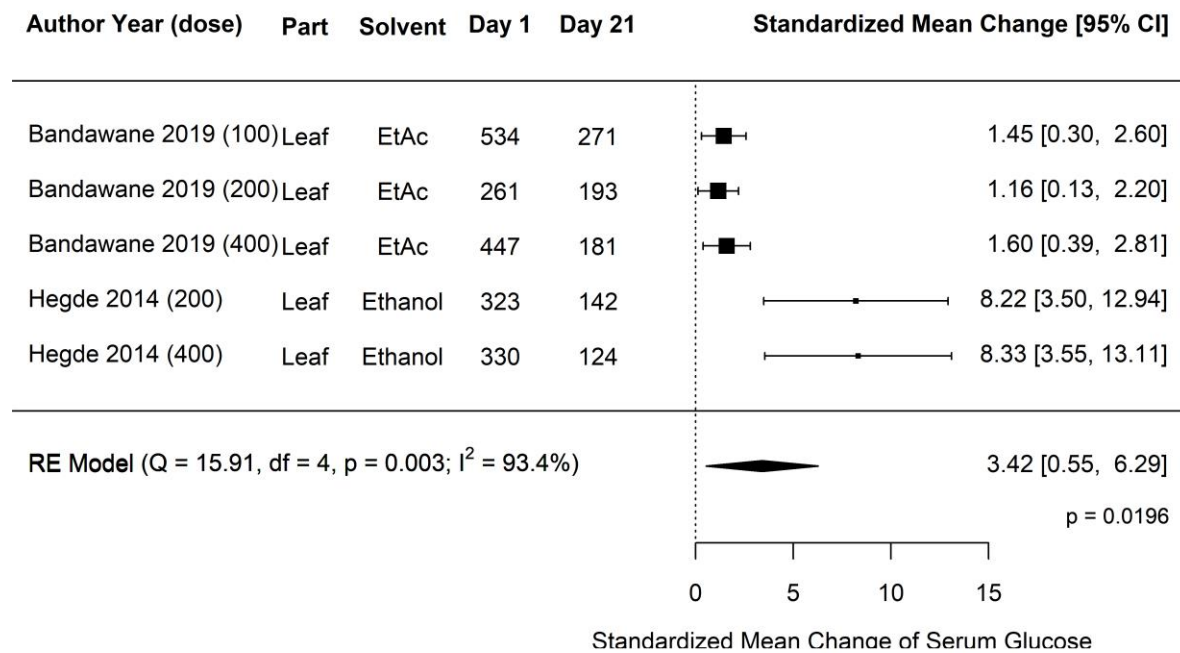

**b**

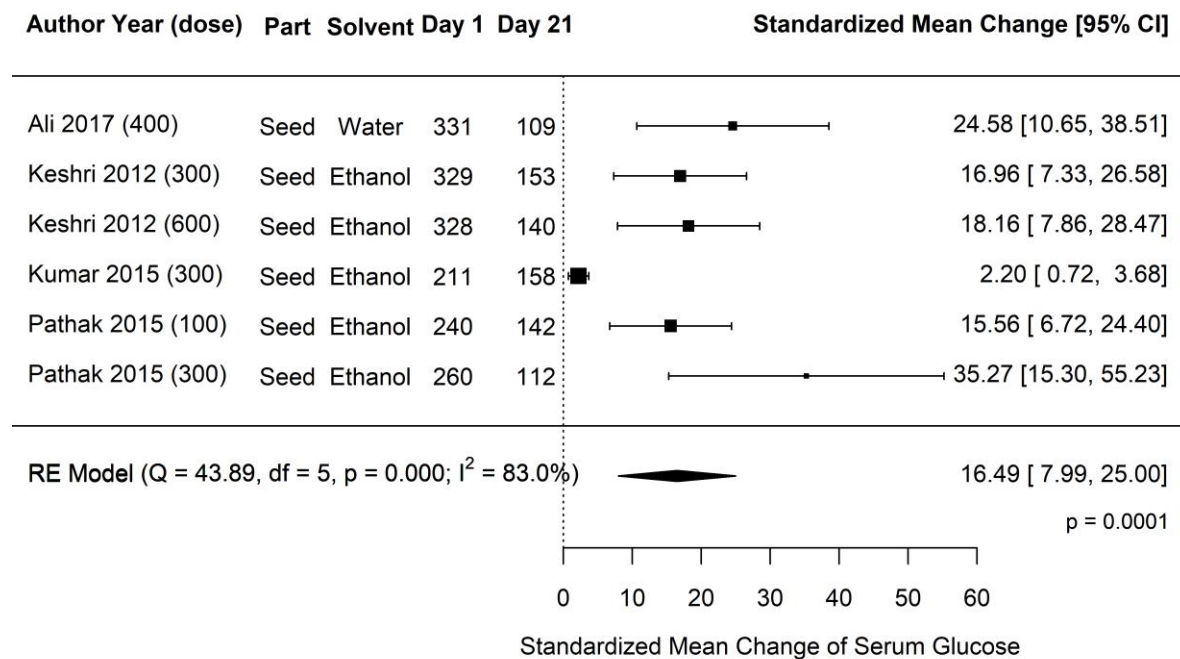

**Figure 4: Subgroup analysis of standardized mean change of serum glucose between day 1 and day 21 in animals treated with (a) HA leaf extract and (b) HA seed extract.**
